# Supplementary material
Source: Springer Nature journal article supplement (https://www.springermedizin.de/resource/supplementary/12936_2013_2970_MOESM3_ESM.pdf/9544724)
Supplement: MOESM3 [file 9544724]

Total number of administrative districts=30

**Odisha**

Districts stratified on the basis of year of implementation of ACTs and RDTs (3 categories)

ACT rolled out in entire district in the year 2008 (13 Districts)  
CATEGORY-I

ACT rolled out in selected PHC/CHCs of the district in the year 2008 (12 Districts)  
CATEGORY-II

ACT rolled out in the districts in the year 2010 (6 Districts)  
CATEGORY-III

*Random Selection*

Two Districts Selected

Two Districts Selected

One district Selected

**Total number of selected districts = 5**

Total number of blocks in five selected districts=65  
Total number of CHCs in the sampled blocks = 43

*Random Selection*

Two Blocks selected in each District

**One CHC was chosen from each Block for Health facility survey**

**Total number of CHCs selected = 11**

Total number of PHCs in selected districts= 220

*Random Selection*

Two PHCs selected in each Block

**Two PHCs were chosen from each Block for Health facility survey**

**Total number of PHCs selected = 18**

Total number of SCs in selected districts=1286  
Total number of SCs in the sampled blocks = 261

All SCs were selected under each CHC (ANMs)

**Total number of ANMs interviewed =220**

*Random Selection*

One ASHA from each Sub-Centre

**Total Number of ASHAs Interviewed= 235**
